# Supplementary material for: Synthesis of ultralow density 3D graphene–CNT foams using a two-step method
Source: Royal Society of Chemistry journal article supplement (doi:10.1039/c6nr04252j), 2016-01-01
Supplement: c6nr04252j3.pdf [file c6nr04252j3.pdf]

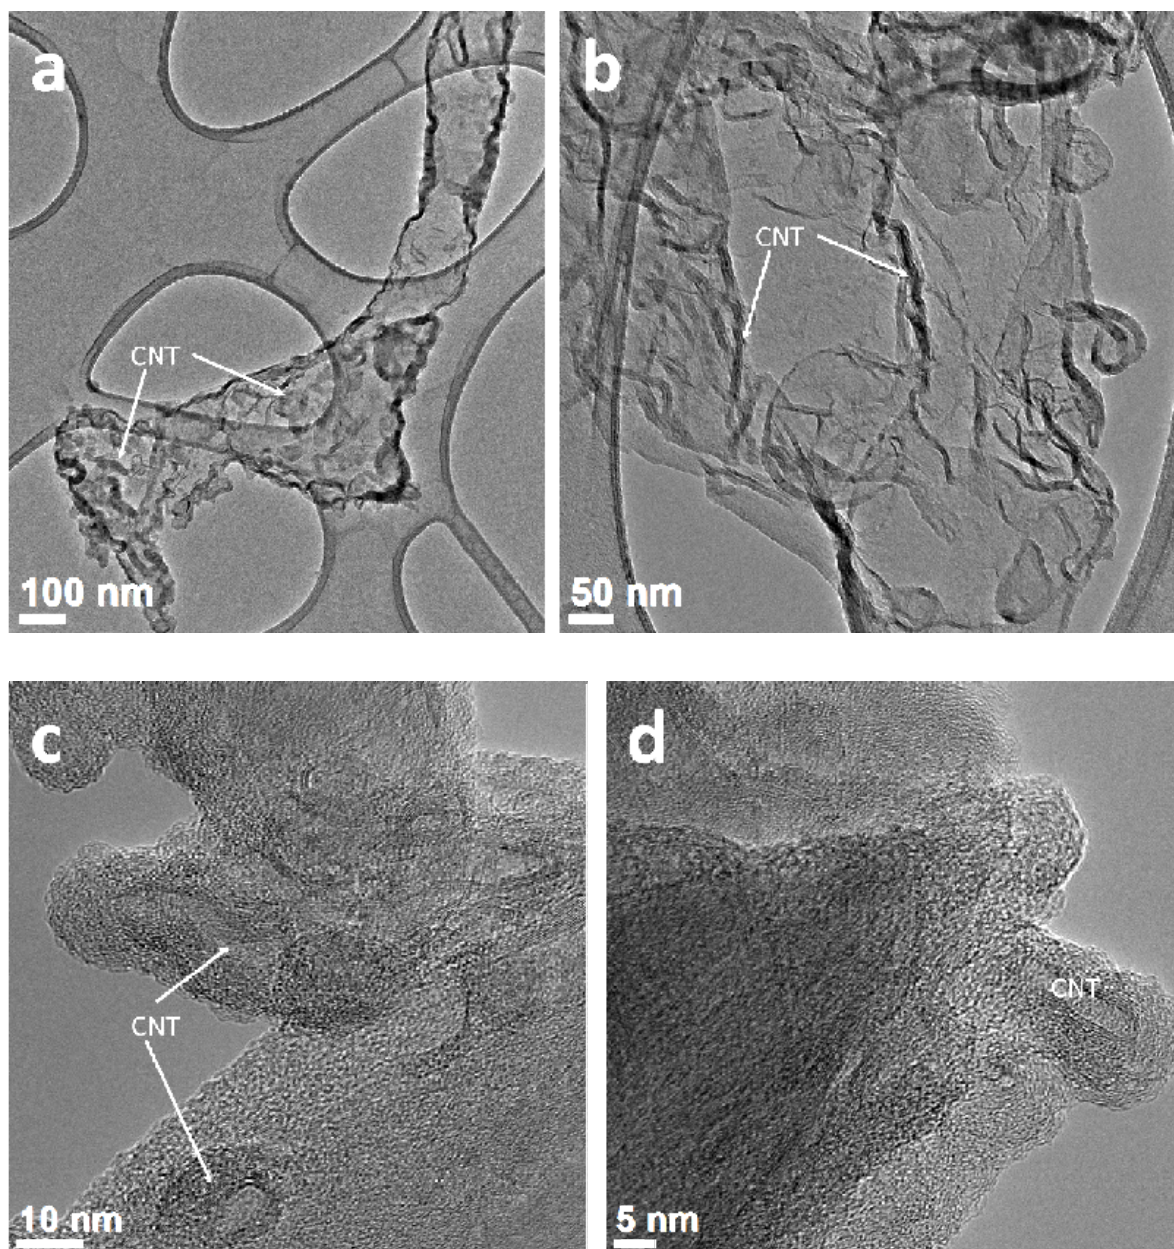

**Supplementary Figure 1:** (a,b) TEM of rGO-CNT foam showing CNT growth on rGO flakes (c,d) HRTEM of rGO-CNT foam showing CNT and rGO junctions.

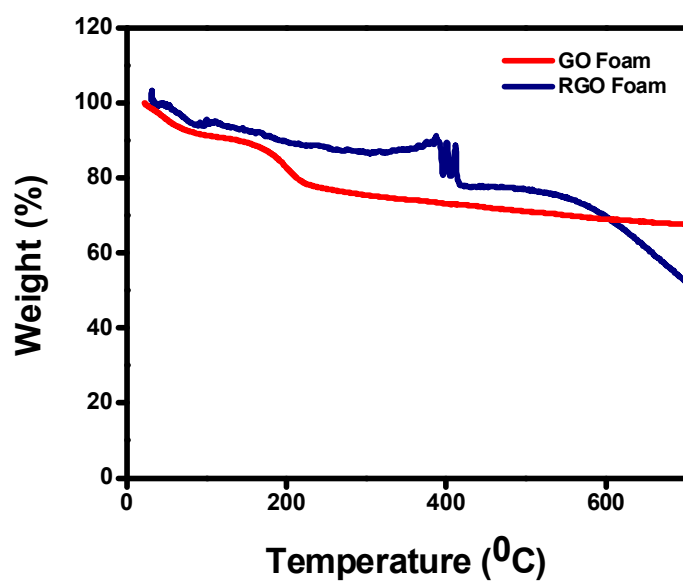

**Supplementary Figure 2: TGA plots for GO and rGO foam showing substantial weight decrease for GO foam at 200<sup>0</sup>C while rGO foam shows gradual decomposition.**

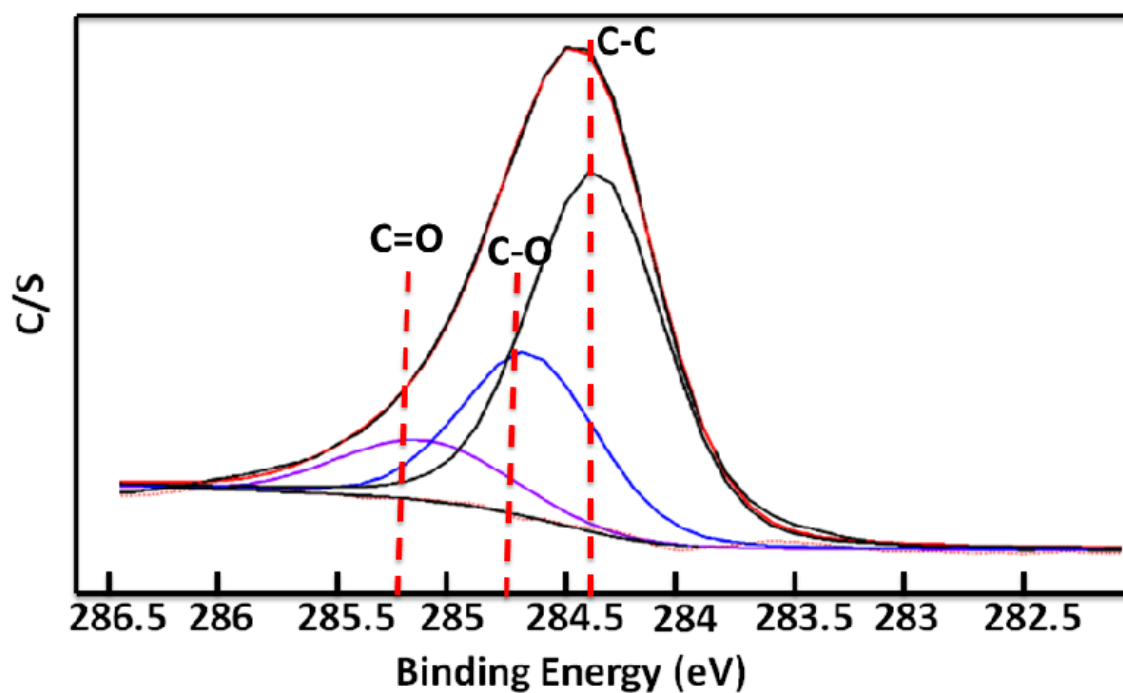

**Supplementary Figure 3: XPS Spectrum of rGO-CNT foam.** In high-resolution XPS analysis, the C-C and C-O bonds are at 284.4 and 284.7eV. The peak at 285.2 corresponds to C=O bonding.
